# Supplementary material
Source: publisher figshare collection journal article supplement (https://frontiersin.figshare.com/ndownloader/files/13662218)

Fig. S1

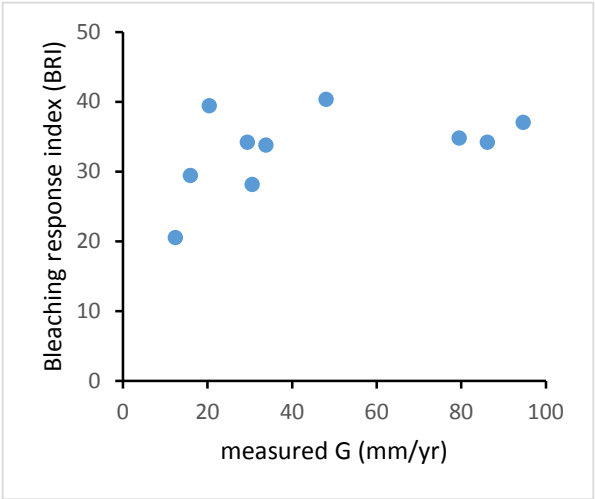

Supplement: Supplementary file 1 [file 13662218]
